# Supplementary material for: Crystallization kinetics of (S)-4′-(1-methylheptyloxycarbonyl)biphenyl-4-yl 4-[4-(2,2,3,3,4,4,4-heptafluorobutoxy)but-1-oxy]-2-fluorobenzoate
Source: Royal Society of Chemistry journal article supplement (doi:10.1039/d4cp00198b), 2024-01-01
Supplement: d4cp00198b1.pdf [file d4cp00198b1.pdf]

## Crystallization kinetics of (S)-4'-(1-methylheptyloxycarbonyl)biphenyl-4-yl 4-[4-(2,2,3,3,4,4,4-heptafluorobutoxy)but-1-oxy]-2-fluorobenzoate

Aleksandra Deptuch<sup>1,\*</sup>, Sebastian Lalik<sup>2</sup>, Małgorzata Jasiurkowska-Delaporte<sup>1</sup>, Magdalena Urbańska<sup>3</sup>,  
Monika Marzec<sup>2</sup>

<sup>1</sup> Institute of Nuclear Physics Polish Academy of Sciences, Radzikowskiego 152, PL-31342 Kraków, Poland

<sup>2</sup> Institute of Physics, Jagiellonian University, Łojasiewicza 11, PL-30348 Kraków, Poland

<sup>3</sup> Institute of Chemistry, Military University of Technology, Kaliskiego 2, PL-00908 Warsaw, Poland

\*corresponding author, [aleksandra.deptuch@ifj.edu.pl](mailto:aleksandra.deptuch@ifj.edu.pl)

### Supplementary Materials

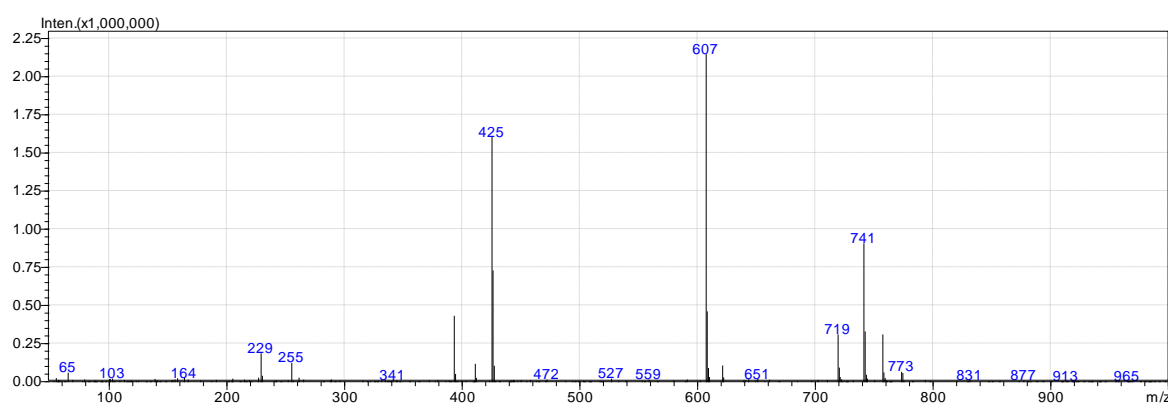

Figure S1. Mass spectrum (+) of 3F4HPhF6, measured using the Shimadzu HPLC prominence chromatograph with MS (API-ESI) detector 2010EV. MS: 741[M + Na]<sup>+</sup>, 719[M + H]<sup>+</sup>, purity 99.9%. For details, see Supplementary Materials of Ref. [2].

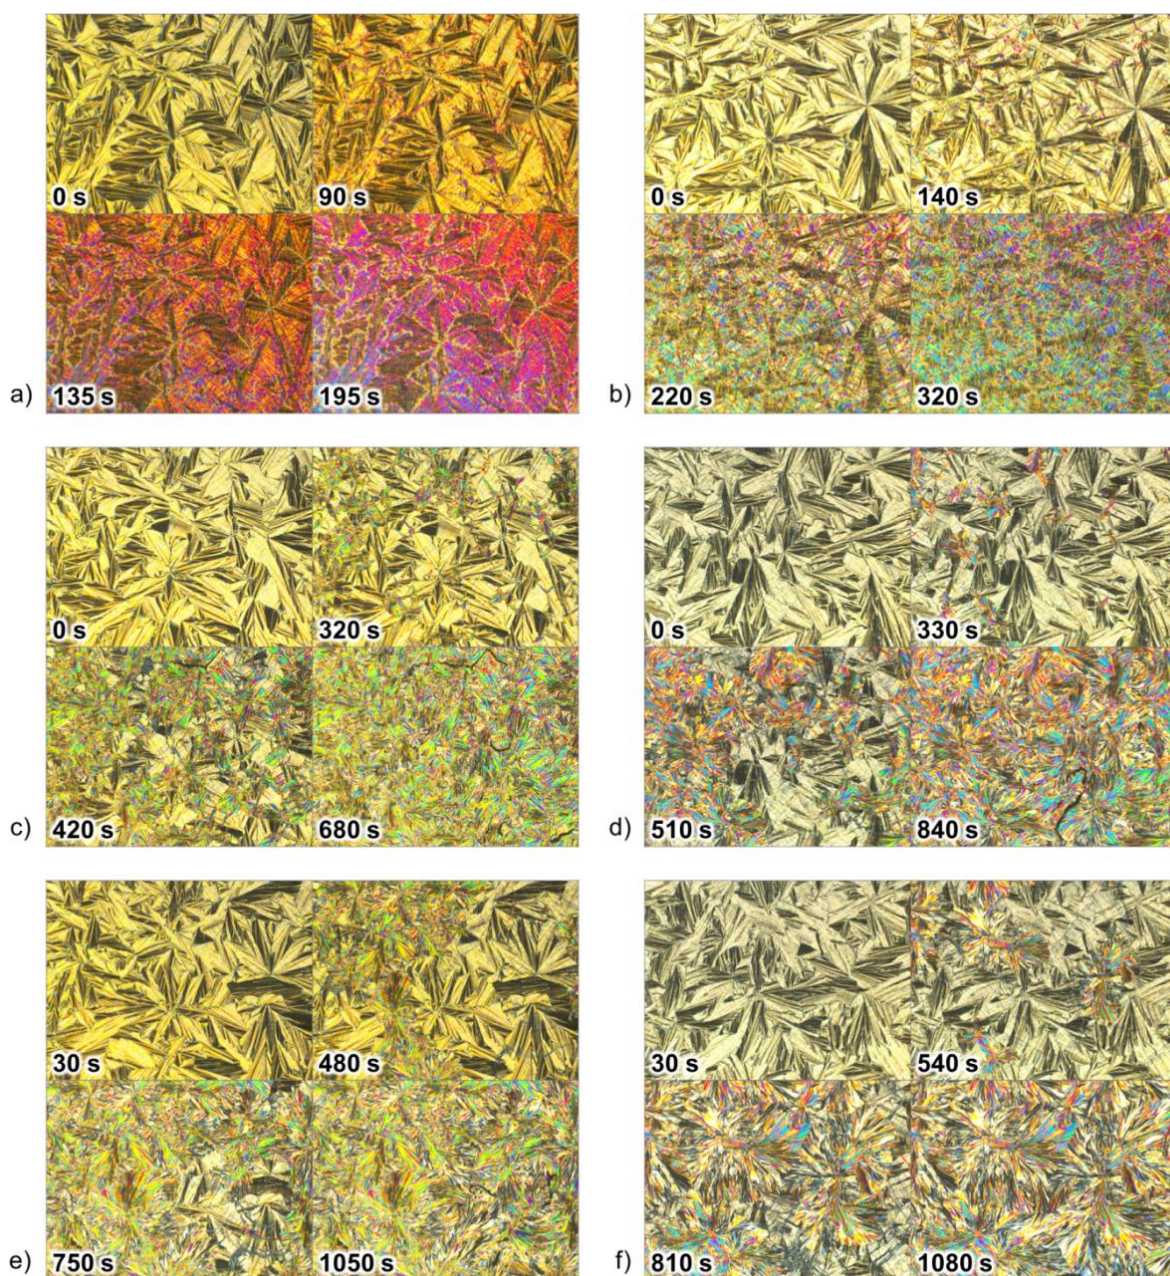

Figure S2. POM textures registered during isothermal melt crystallization in 285 K (a), 287 K (b), 289 K (c), 290 K (d), 291 K (e), and 292 K (f) after cooling with the 30 K/min rate from the isotropic liquid phase.

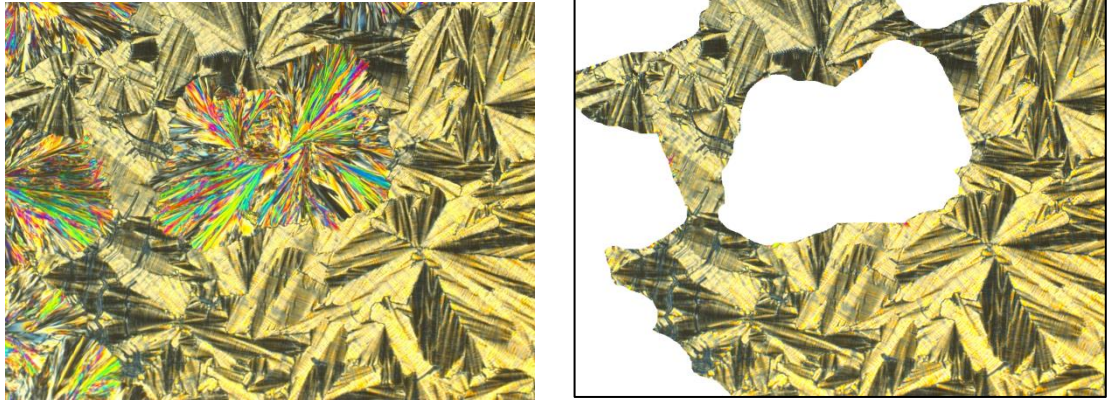

Figure S3. Determination of the crystallization degree as a fraction of the texture's area covered by the crystal phase ( $T_{cr} = 293$  K,  $t = 750$  s). The crystal's texture was manually covered by white and the number of white pixels was obtained using the histogram function in ImageJ.

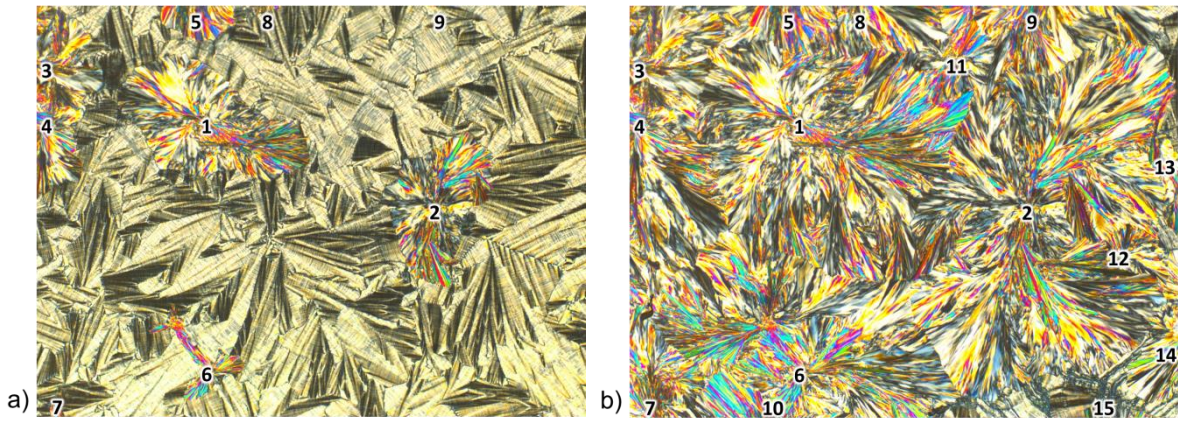

Figure S4. Manual calculation of nuclei for  $T_{cr} = 292$  K at 480 s (a) and 960 s (b). The numbers assigned to each nuclei were copied to consecutive textures to avoid skipping any crystallite.

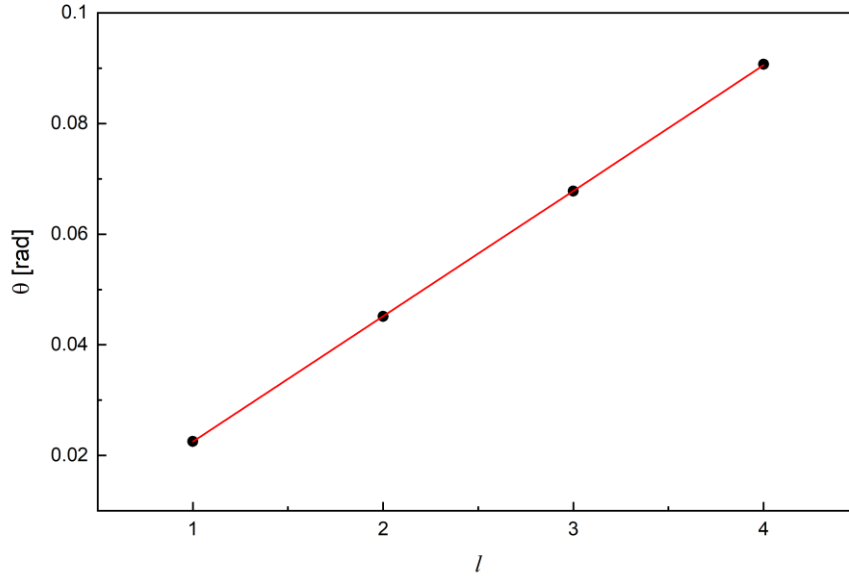

Figure S5. An example of determination of the characteristic period  $d$  for a sample crystallized in 303 K. The fitted function is  $\theta(l) = \theta_0 + \arcsin(l\lambda/2d)$ , where  $\theta$  are positions of the  $l^{\text{th}}$  order diffraction peaks,  $\theta_0$  is the systematic shift in the peak's position and  $\lambda = 1.5406 \text{ \AA}$  is the CuK $\alpha$  radiation wavelength. The function is another form of the Bragg equation  $l\lambda = 2d \sin(\theta - \theta_0)$ .

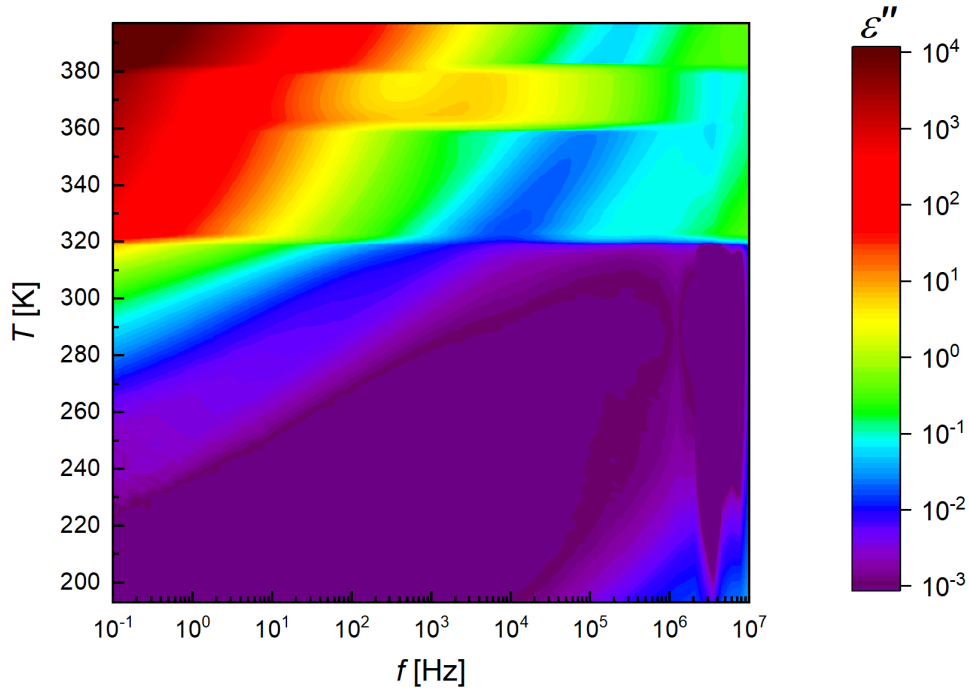

Figure S6. Dielectric absorption of 3F4HPhF6 upon heating after cooling from the isotropic liquid with the 15 K/min rate.

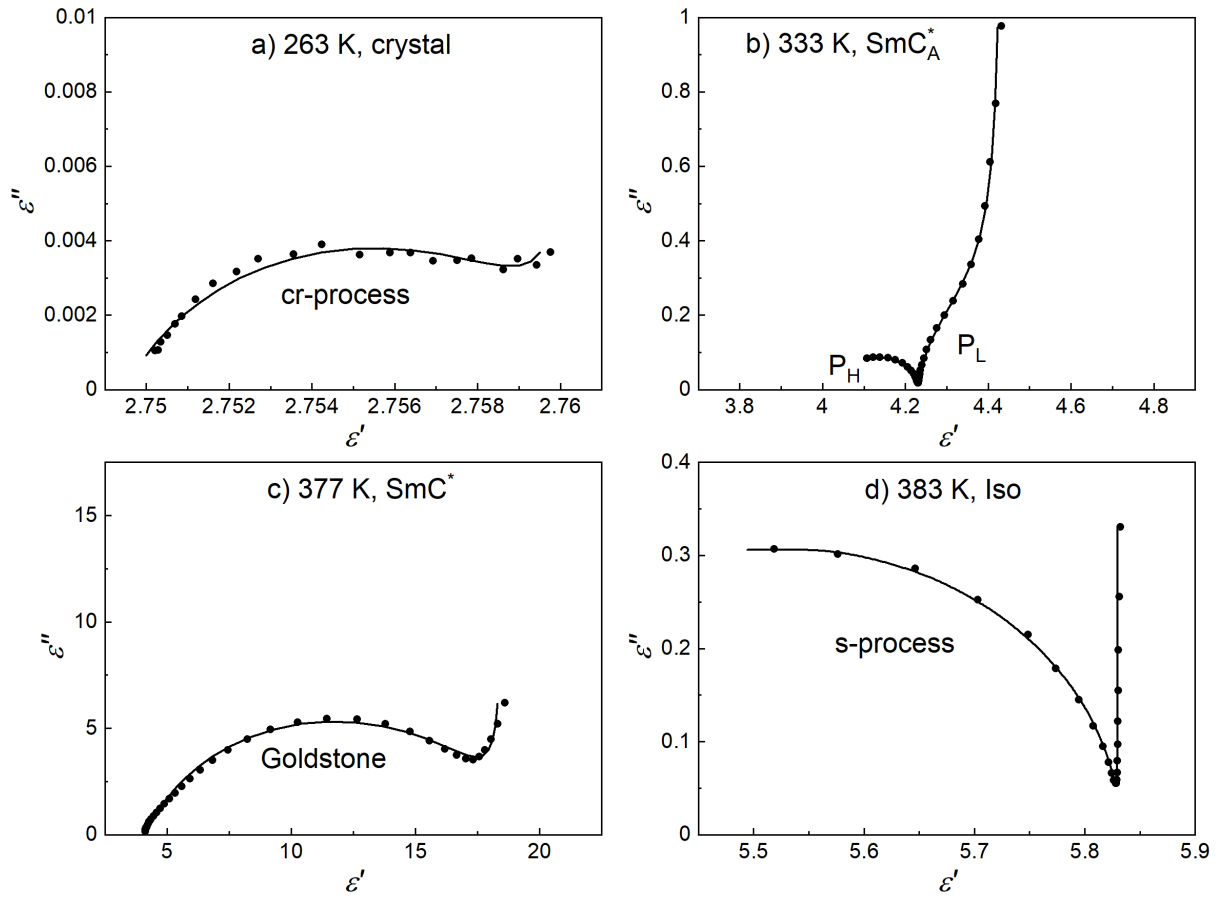

Figure S7. Cole-Cole plots of experimental BDS spectra (points) and fitting results of Equation (1) (lines) for different phases of 3F4HPhF6.
